# Supplementary material
Source: publisher site journal article supplement (https://www.spandidos-publications.com/4322/downloadSupplementary)
Supplement: Supplementary file 1 [file downloadSupplementary]

## Sheet: 29 Patients
	Data S1. Raw Immune Cell Counts.
	Pt ID #	Total Average CD8+ T cells	Total Average CD4+ T cells	Total Average OX40+ cells	OX40+CD8+ T cells	Total OX40% CD8+ T cells	OX40+CD4+ T cells	Total OX40% CD4+ T cells	Total Average TIM3+ cells	TIM-3+CD8+ T cells	Total TIM3% CD8+ T cells	TIM-3+CD4+ T cells	Total TIM3% CD4+ T cells
	1	130.5	63.5	6	1	0.595238	0	0	21.5	7	7.52688	4	6.55738
	2	28	35	8	0	0	1	1.51515	17	3	7.69231	3	75
	3	10	4	7	6	54.5455	0	0	2.5	2	22.2222	0	0
	4	155.5	509	26	0	0	0	0	317.5	61	32.973	19	8.63636
	5	10	71.5	7.5	0	0	0	0	36.5	0	0	5	5.37634
	6	5	0.5	1.5	0	0	0	0	1	1	100	0	0
	7	68.5	291.5	142	1	1.42857	112	26.6667	125	0	0	33	20.2454
	8	22.5	55.5	55.5	8	27.5862	2	3.125	3	0	0	0	0
	9	4.5	1	1	1	16.6667	0	0	1	0	0	0	0
	10	57	18.5	12.5	2	22.2222	0	0	6	0	0	0	0
	11	132.5	29.5	16.5	17	27.4194	7	15.6	73	52	25.6158	0	0
	12	60	31	10.5	8	7.20721	3	13.6364	8.5	2	22.2222	7	17.5
	13	2	74	9.5	0	0	1	1.11111	9.5	0	0	2	3.44828
	14	39.5	145.5	6	0	0	1	0.609756	1.5	2	16.6667	0	0
	15	87.5	21.5	27.5	11	11.1111	2	9.09091	60	26	34.2105	8	38.0952
	16	38.5	25	4	1	5	0	0	62	24	61.5385	6	31.5789
	17	7.5	13	5.5	3	37.5	1	16.6667	14	4	57.1429	5	25
	18	11	47	10.5	0	0	7	9.09091	32	5	35.7143	0	0
	19	4	19	6	1	16.6667	0	0	8.5	0	0	1	3.125
	20	20	34.5	19.5	5	16.129	5	41.6667	18	0	0	16	28.0702
	21	50.5	61.5	1	0	0	0	0	141.5	20	25	2	4.4444
	22	9	6	2	0	0	2	20	11.5	7	41.1765	1	50
	23	15.5	12.5	2.5	0	0	0	0	14.5	4	33.3333	2	20
	24	49.5	29	6	0	0	4	9.30233	4.5	0	0	1	6.66667
	25	19.5	9	2.5	0	0	2	13.3333	9	0	0	0	0
	26	34	14	5	0	0	5	22.7273	54	17	25	0	0
	27	5.5	22.5	4	0	0	2	22.2222	9	1	10	4	11.1111
	28	74	21.5	6.5	8	10	2	7.14286	11.5	4	0	4	26.6667
	29	38	54.5	2	0	0	1	1.72414	187	26	44.0678	18	35.2941

## Sheet: Original 10 patients 
			Average Number of T cells per field
		Patient	PD-1	OX40	TIM-3	LAG-3	BTLA	CD137
		1	5	11.5	21.5	0.5	0	2.5
		2	0	3.5	17	0	0	0.5
		3	0	10	2.5	0.5	0	0
		4	1.5	30	317.5	1.5	22.5	56.5
		5	0.5	5.5	36.5	0.5	0	4
		6	0	5	1	0	0.5	0.5
		7	70.5	126	125	132.5	9.5	0.5
		8	1	32.5	3	0	2.5	0.5
		9	59.5	12	1	0.5	24	18.5
		10	1	14	6	4	6.5	5
		Total Median Number of Postive cells/field of all patients	1	11.75	11.5	0.5	1.5	1.5
